# Supplementary material
Source: publisher figshare collection journal article supplement (https://acs.figshare.com/ndownloader/files/5459285)
Supplement: Supplementary file 1 [file 5459285]

## Supporting Information

### Visible-Light-Responsive $\text{CuLi}_{1/3}\text{Ti}_{2/3}\text{O}_2$ Powders Prepared by a Molten $\text{CuCl}$ Treatment of $\text{Li}_2\text{TiO}_3$ for Photocatalytic $\text{H}_2$ Evolution and Z-Schematic Water Splitting

Katsuya Iwashina,<sup>a</sup> Akihito Iwase,<sup>a,b</sup> Shunsuke Nozawa,<sup>c</sup> Shin-ichi Adachi,<sup>c,d</sup> Akihiko Kudo<sup>a,b,\*</sup>

<sup>a</sup> *Department of Applied Chemistry, Faculty of Science, Tokyo University of Science, 1-3 Kagurazaka, Shinjuku-ku, Tokyo 162-8601, Japan*

<sup>b</sup> *Photocatalysis International Research Center, Research Institute for Science and Technology, Tokyo University of Science, 2641 Noda-shi, Yamazaki, Chiba-ken, Japan*

<sup>c</sup> *Institute of Materials Structure Science, High Energy Accelerator Research Organization, 1-1 Oho, Tsukuba, Ibaraki 305-0801, Japan*

<sup>d</sup> *Department of Materials Structure Science, School of High Energy Accelerator Science, The Graduate University for Advanced Studies, 1-1 Oho, Tsukuba, Ibaraki 305-0801, Japan*

#### Photoelectrochemical measurement

$\text{CuLi}_{1/3}\text{Ti}_{2/3}\text{O}_2$  and  $\text{TiO}_2$  electrodes were prepared by an electrophoretic method. 0.1 g of  $\text{CuLi}_{1/3}\text{Ti}_{2/3}\text{O}_2$  or  $\text{TiO}_2$  was dispersed in 20 mL of acetone (Kanto Chemical; 99.0%). Two FTO electrodes (AGC fabritech;  $< 12 \Omega/\square$ , 1.8 mm $\times$ 10 mm $\times$ 20 mm) were parallel immersed with distance of 1 cm in the suspension, and 60 V was applied between the two electrodes for 1–2 min using a direct-current power source (GPC-6030D; GW INSTEK). These electrodes calcined at 573 K for 2 h in  $\text{N}_2$  for  $\text{CuLi}_{1/3}\text{Ti}_{2/3}\text{O}_2$  and in air for  $\text{TiO}_2$ . Photoelectrochemical properties were evaluated using a potentiostat (Hokuto Denko; HZ-5000) and an H-type cell with Nafion 117 (Dupont). Platinum and Ag/AgCl with saturated KCl electrodes (DKK-TOA) were used as counter and reference electrodes, respectively. A buffered aqueous solution containing 0.1 mol L<sup>-1</sup> of  $\text{K}_2\text{SO}_4$  (Kanto Chemical; 99.0%), 0.025 mol L<sup>-1</sup> of  $\text{Na}_2\text{HPO}_4$  (Kanto Chemical; 99.5%), and 0.025 mol L<sup>-1</sup> of  $\text{KH}_2\text{PO}_4$  (Kanto Chemical; 99.6%) was used as an electrolyte at pH 6.9. The electrolytes in both compartments were bubbled with  $\text{N}_2$  for deaeration before measurements. A 300 W Xe arc lamp (PerkinElmer; CERMAX PE300BF) with long-pass filters (HOYA), an NIR-absorbing filter (Sigma Koki; CCF-50S-500C) and a plano-convex lens (Sigma Koki; SLSQ- 60\_150P) was used as a light source.

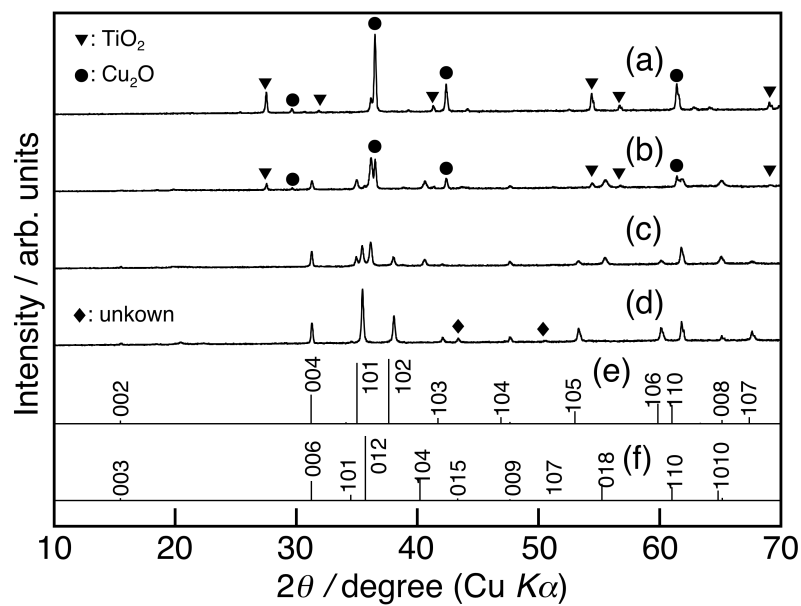

**Figure S1** X-ray diffraction patterns of  $\text{CuLi}_{1/3}\text{Ti}_{2/3}\text{O}_2$  prepared by a solid-state reaction at (a) 673, (b) 873, (c) 1073, and (d) 1273 K for 10 h, (e) hexagonal- $\text{CuFeO}_2$  (PDF: 1-75-2146), and (f) trigonal- $\text{CuFeO}_2$  (PDF: 1-75-2146).

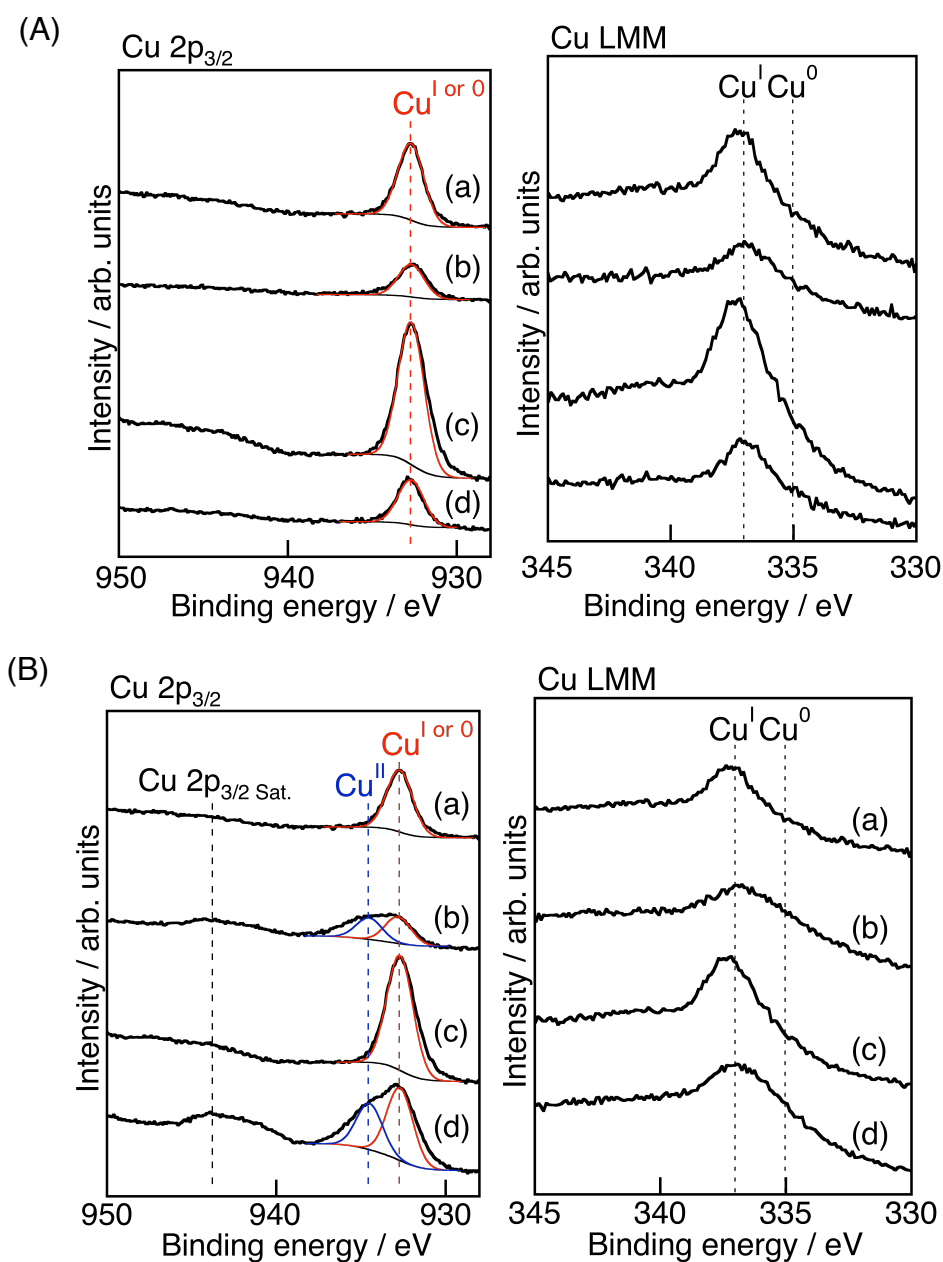

**Figure S2** X-ray photoelectron spectra of (a, b)  $\text{CuLi}_{1/3}\text{Ti}_{2/3}\text{O}_2(\text{hex})$  and (c, d)  $\text{CuLi}_{1/3}\text{Ti}_{2/3}\text{O}_2(\text{tri})$  (a, c) before and (b, d) after photocatalytic  $\text{H}_2$  evolution from aqueous (A)  $0.5 \text{ mol L}^{-1} \text{ K}_2\text{SO}_3 + 0.1 \text{ mol L}^{-1} \text{ Na}_2\text{S}$  and (B) methanol (pH 10, using  $\text{NaOH}_{\text{aq}}$ ) solutions.  $\text{CuLi}_{1/3}\text{Ti}_{2/3}\text{O}_2(\text{hex})$  and  $\text{CuLi}_{1/3}\text{Ti}_{2/3}\text{O}_2(\text{tri})$  were prepared by treating  $\text{Li}_2\text{TiO}_3(\text{cub})$  at 873 K and  $\text{Li}_2\text{TiO}_3(\text{mon})$  at 773 K with a molten  $\text{CuCl}$ , respectively.

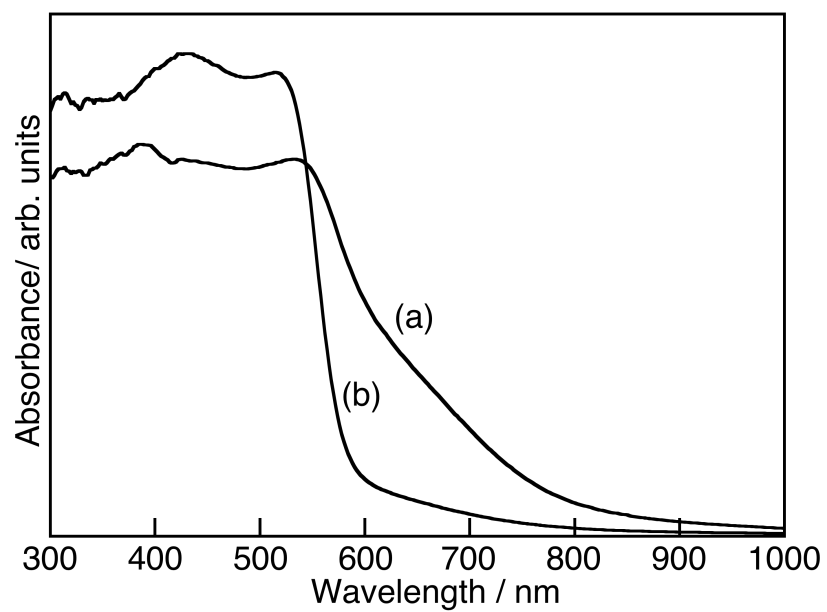

**Figure S3** Diffuse reflectance spectra of hexagonal-CuLi<sub>1/3</sub>Ti<sub>2/3</sub>O<sub>2</sub> (a) obtained from CuLi<sub>1/3</sub>Ti<sub>2/3</sub>O<sub>2</sub>(tri) by calcination at 1273 K for 2 h in N<sub>2</sub> and (b) prepared by a solid-state reaction at 1273 K for 10 h.

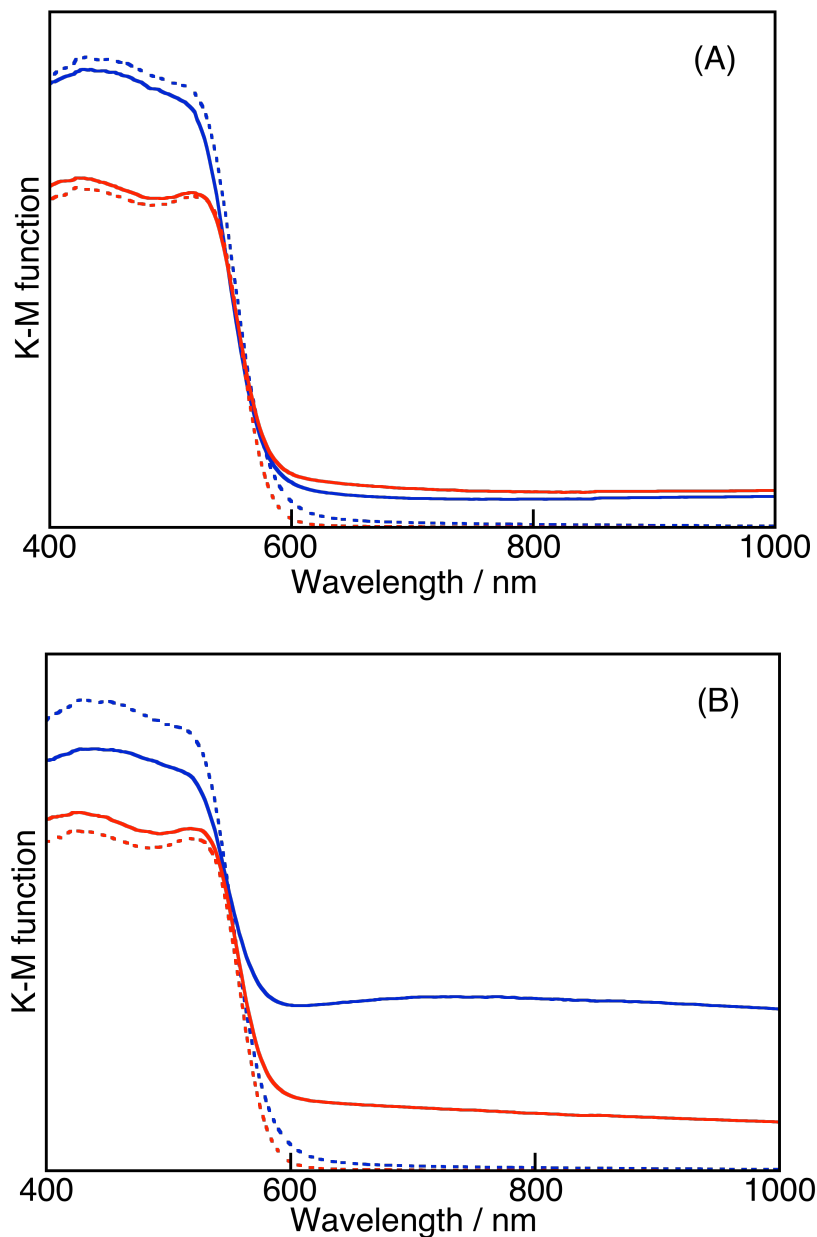

**Figure S4** Diffuse reflectance spectra of (red lines)  $\text{CuLi}_{1/3}\text{Ti}_{2/3}\text{O}_2(\text{hex})$  and (blue lines)  $\text{CuLi}_{1/3}\text{Ti}_{2/3}\text{O}_2(\text{tri})$  (dotted lines) before and (solid lines) after photocatalytic  $\text{H}_2$  evolution from aqueous (A)  $0.5 \text{ mol L}^{-1} \text{K}_2\text{SO}_3 + 0.1 \text{ mol L}^{-1} \text{Na}_2\text{S}$  and (B) methanol (pH 10, using  $\text{NaOH}_{\text{aq.}}$ ) solutions.

$\text{CuLi}_{1/3}\text{Ti}_{2/3}\text{O}_2(\text{hex})$  and  $\text{CuLi}_{1/3}\text{Ti}_{2/3}\text{O}_2(\text{tri})$  were prepared by treating  $\text{Li}_2\text{TiO}_3(\text{cub})$  at 873 K and  $\text{Li}_2\text{TiO}_3(\text{mon})$  at 773 K with a molten  $\text{CuCl}$ , respectively.

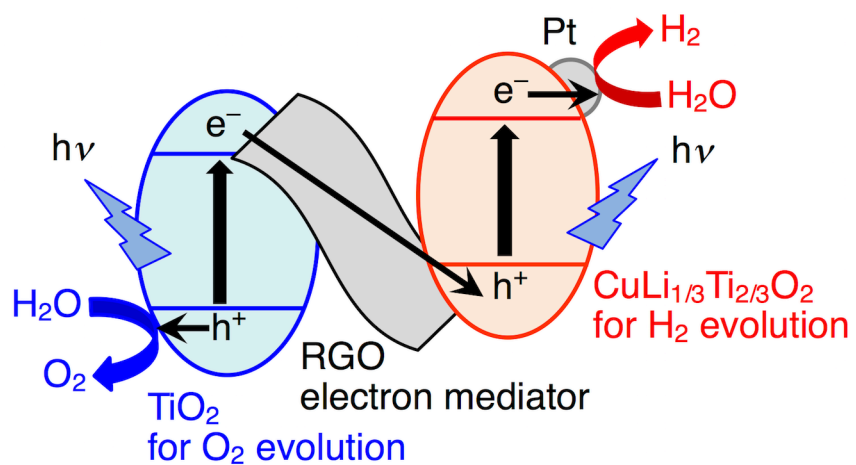

**Figure S5** An illustration of a constructed Z-scheme system consisting of Pt/ $\text{CuLi}_{1/3}\text{Ti}_{2/3}\text{O}_2$ ,  $\text{TiO}_2$ , and an RGO electron mediator.

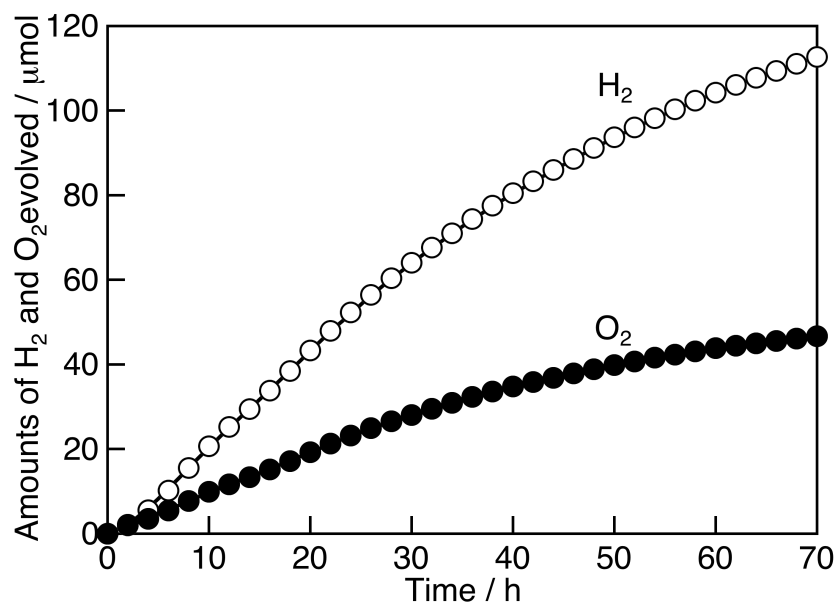

**Figure S6** Z-schematic water splitting using Pt(0.3 wt%)-loaded  $\text{CuLi}_{1/3}\text{Ti}_{2/3}\text{O}_2(\text{hex})$  and RGO- $\text{TiO}_2$  composite.

Catalyst: 0.05 g each, solution: water without pH adjustment (120 mL), light source: 300 W Xe lamp, cell: top-irradiation cell with a Pyrex window.

$\text{CuLi}_{1/3}\text{Ti}_{2/3}\text{O}_2(\text{hex})$  was prepared by treating  $\text{Li}_2\text{TiO}_3(\text{cub})$  at 873 K with a molten  $\text{CuCl}$ .

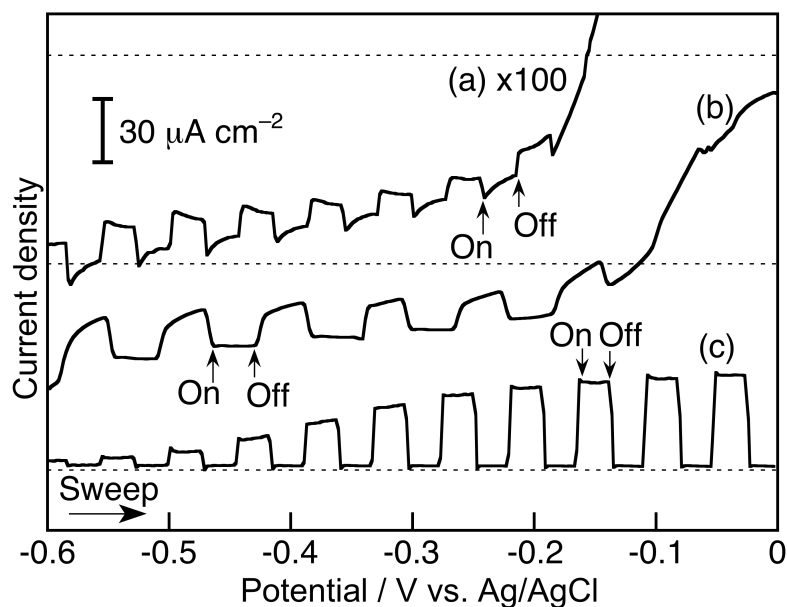

**Figure S7** Current vs. potential curves of (a)  $\text{CuLi}_{1/3}\text{Ti}_{2/3}\text{O}_2(\text{hex})$ , (b)  $\text{CuLi}_{1/3}\text{Ti}_{2/3}\text{O}_2(\text{tri})$ , and (c)  $\text{TiO}_2$  photoelectrodes. (a, b)  $\lambda > 420 \text{ nm}$  and (c)  $\lambda > 300 \text{ nm}$ . Electrolyte:  $0.1 \text{ mol L}^{-1} \text{K}_2\text{SO}_4 \text{ aq.} + 0.05 \text{ mol L}^{-1} \text{KH}_2\text{PO}_4 \text{ aq.} + 0.05 \text{ mol L}^{-1} \text{NaH}_2\text{PO}_4 \text{ aq.}$  (pH 6.8), sweep rate:  $20 \text{ mV s}^{-1}$ , light source: 300 W Xe lamp. Dashed line showed 0 A for each electrode.

$\text{CuLi}_{1/3}\text{Ti}_{2/3}\text{O}_2(\text{hex})$  and  $\text{CuLi}_{1/3}\text{Ti}_{2/3}\text{O}_2(\text{tri})$  were prepared by treating  $\text{Li}_2\text{TiO}_3(\text{cub})$  at 873 K and  $\text{Li}_2\text{TiO}_3(\text{mon})$  at 773 K with a molten  $\text{CuCl}$ , respectively.
